# Supplementary material for: Au–Pd@ZnO alloy nanoparticles: a promising heterogeneous photocatalyst toward decarboxylative trifluoromethylation under visible-light irradiation
Source: Royal Society of Chemistry journal article supplement (doi:10.1039/d2nj02212e), 2022-01-01
Supplement: d2nj02212e1.pdf [file d2nj02212e1.pdf]

Supporting Information

**Au-Pd@ZnO Alloy Nanoparticles: Promising Heterogeneous  
Photocatalyst toward Decarboxylative Trifluoromethylation under  
Visible-Light Irradiation**

Zahra Bazyar<sup>a</sup>, Mina Tavakoliana<sup>a</sup> and Mona Hosseini-Sarvari<sup>a\*</sup>

<sup>a</sup> Nano Photocatalysis Lab, Department of Chemistry, Shiraz University, Shiraz 7194684795, I.R. Iran

\*E-mail: [hossaini@shirazu.ac.ir](mailto:hossaini@shirazu.ac.ir)

| <b>Table of Contents</b>                                            | <b>page</b> |
|---------------------------------------------------------------------|-------------|
| Nitrogen adsorption-desorption data of the prepared materials.....  | S2          |
| SEM image of the reused catalyst.....                               | S2          |
| Experimental Data for Trifluoromethylatin.....                      | S2          |
| <sup>1</sup> H and <sup>13</sup> C NMR spectra of the products..... | S7          |

**Table S1. Results of BET for Au-Pd@ZnO and ZnO**

| Sample    | BET surface area (m <sup>2</sup> .g <sup>-1</sup> ) | Mean pore diameter (nm) | Pore volume of pores (cm <sup>3</sup> .g <sup>-1</sup> ) |
|-----------|-----------------------------------------------------|-------------------------|----------------------------------------------------------|
| Au-Pd@ZnO | 40.3                                                | 35.0                    | 0.43                                                     |
| ZnO       | 37.4                                                | 24.3                    | 0.24                                                     |

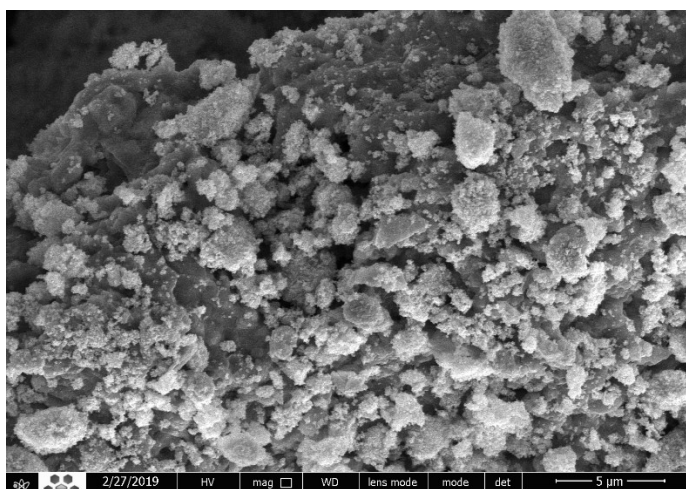

Figure S1. SEM image of the reused catalyst

## Experimental Data for Trifluoromethylation

### 1-Ethyl-4-(trifluoromethyl)benzene (2a) [3]

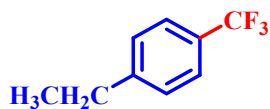

Colorless oil, TLC (Petroleumether: Ethyl acetate, 90:10 v/v):  $R_f = 0.72$ ; IR (thin film) 3068, 2964, 2855, 1593, 1515, 1476, 1370, 1248, 1168, 1076 cm<sup>-1</sup>; <sup>1</sup>H NMR (400 MHz, DMSO-*d*<sub>6</sub>):  $\delta$  7.75-7.73 (d, 2H,  $J = 4$  Hz), 7.18-7.16 (d, 2H,  $J = 4$  Hz), 2.60-2.58 (q, 2H,  $J = 8$  Hz), 1.19-1.15 (t, 3H,  $J = 8$  Hz), <sup>13</sup>C NMR (100 MHz, DMSO-*d*<sub>6</sub>):  $\delta$  146.51, 145.67, 134.59 (q,  $J_{C-F} = 13$  Hz), 134.24, 133.91, 133.56, 130.09 (q,  $J_{C-F} = 8$  Hz), 126.8, 28.23, 15.47; <sup>19</sup>F NMR (376 MHz, DMSO-*d*<sub>6</sub>)  $\delta$  -73.92 (s); UV/Vis (CH<sub>3</sub>CN):  $\lambda_{max}$  276 nm.

### 1-Nitro-4-(trifluoromethyl)benzene (2b) [3]

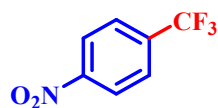

Colorless oil; TLC (Petroleumether: Ethyl acetate, 80:20 v/v):  $R_f = 0.65$ ; IR (thin film) 3051, 1603, 1519, 1259, 1142, 1029  $\text{cm}^{-1}$ ;  $^1\text{H}$  NMR (400 MHz,  $\text{CDCl}_3$ ):  $\delta$  8.12-8.09 (d, 2H,  $J = 12$  Hz), 6.87-6.83 (d, 2H,  $J = 12$  Hz),  $^{13}\text{C}$  NMR (100 MHz,  $\text{CDCl}_3$ ):  $\delta$  138.14, 129.26 (q,  $J_{\text{C-F}} = 84$  Hz), 129.06 (q,  $J_{\text{C-F}} = 13$  Hz), 126.74 (q,  $J_{\text{C-F}} = 3$  Hz), 127.87 (q,  $J_{\text{C-F}} = 270$  Hz);  $^{19}\text{F}$  NMR (376 MHz,  $\text{CDCl}_3$ )  $\delta$  -62.99 (s); UV/Vis ( $\text{CH}_3\text{CN}$ ):  $\lambda_{\text{max}}$  294 nm.

#### 1-Nitro-2-(trifluoromethyl)benzene (2c) [3]

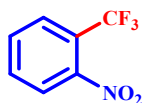

Colorless oil; TLC (Petroleumether: Ethyl acetate, 85:15 v/v):  $R_f = 0.67$ ; IR (thin film) 3061, 1610, 1545, 1270, 1166  $\text{cm}^{-1}$ ;  $^1\text{H}$  NMR (400 MHz,  $\text{CDCl}_3$ ):  $\delta$  7.98-7.94 (d, 1H,  $J = 10$  Hz), 7.79-7.75 (d, 1H,  $J = 10$  Hz), 7.45-7.38 (t, 1H,  $J = 10$  Hz), 7.23-7.16 (t, 1H,  $J = 10$  Hz),  $^{13}\text{C}$  NMR (100 MHz,  $\text{CDCl}_3$ ):  $\delta$  132.88, 132.33 (d,  $J_{\text{C-F}} = 2$  Hz), 131.42, 129.09 (q,  $J_{\text{C-F}} = 52$  Hz), 127.59 (q,  $J_{\text{C-F}} = 5$  Hz), 126.98 (q,  $J_{\text{C-F}} = 271$  Hz), 126.69;  $^{19}\text{F}$  NMR (376 MHz,  $\text{CDCl}_3$ )  $\delta$  -63.26 (s); UV/Vis ( $\text{CH}_3\text{CN}$ ):  $\lambda_{\text{max}}$  276 nm.

#### 1-Chloro-2-(trifluoromethyl)benzene (2d) [3]

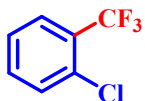

Colorless oil; TLC (Petroleumether: Ethyl acetate, 90:10 v/v):  $R_f = 0.91$ ; IR (thin film) 3024, 1595, 1488, 1193, 1133, 1089  $\text{cm}^{-1}$ ;  $^1\text{H}$  NMR (400 MHz,  $\text{CDCl}_3$ ):  $\delta$  7.73-7.71 (d, 1H,  $J = 8$  Hz), 7.54-7.47 (m, 2H), 7.40-7.38 (d, 1H,  $J = 8$  Hz),  $^{13}\text{C}$  NMR (100 MHz,  $\text{CDCl}_3$ ):  $\delta$  144.59, 132.86, 129.18 (q,  $J_{\text{C-F}} = 35$  Hz), 126.53 (q,  $J_{\text{C-F}} = 6$  Hz), 123.73 (q,  $J_{\text{C-F}} = 277$  Hz), 117.48, 117.12, 113.83 (q,  $J_{\text{C-F}} = 29$  Hz);  $^{19}\text{F}$  NMR (376 MHz,  $\text{CDCl}_3$ )  $\delta$  -62.73 (s); UV/Vis ( $\text{CH}_3\text{CN}$ ):  $\lambda_{\text{max}}$  261 nm.

#### 1-Chloro-4-(trifluoromethyl)benzene (2e) [3]

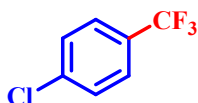

Colorless oil; TLC (Petroleumether: Ethyl acetate, 90:10 v/v):  $R_f = 0.90$ ; IR (thin film) 3050, 1564, 1495, 1213, 1119, 1087  $\text{cm}^{-1}$ ;  $^1\text{H}$  NMR (400 MHz,  $\text{CDCl}_3$ ):  $\delta$  7.47-7.45 (d, 2H,  $J = 8$  Hz), 7.36-7.34 (d, 2H,  $J = 8$  Hz),  $^{13}\text{C}$  NMR (100 MHz,  $\text{CDCl}_3$ ):  $\delta$  138.13 (q,  $J_{\text{C-F}} = 1$  Hz), 129.57 (q,  $J_{\text{C-F}} = 33$  Hz), 129.08, 127.83 (q,  $J_{\text{C-F}} = 269$  Hz), 126.76 (q,  $J_{\text{C-F}} = 4$  Hz),  $^{19}\text{F}$  NMR (376 MHz,  $\text{CDCl}_3$ )  $\delta$  -63.26 (s); UV/Vis ( $\text{CH}_3\text{CN}$ ):  $\lambda_{\text{max}}$  267 nm.

#### (Trifluoromethyl)benzene (2f) [3]

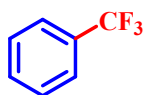

Clear colorless liquid; TLC (Petroleumether: Ethyl acetate, 90:10 v/v):  $R_f = 0.25$ ; IR (thin film) 3039, 1550, 1229, 1138,  $\text{cm}^{-1}$ ;  $^1\text{H}$  NMR (400 MHz,  $\text{CDCl}_3$ ):  $\delta$  7.21-7.18 (t, 1H), 7.10-7.05 (t, 2H), 6.76-6.73 (d, 2H),  $^{13}\text{C}$  NMR (100 MHz,  $\text{DMSO}-d_6$ ):  $\delta$  138.35 (q,  $J_{\text{C-F}} = 11$  Hz), 134.42 (q,  $J_{\text{C-F}} = 203$  Hz), 133.40, 129.97, 127.38 (q,  $J_{\text{C-F}} = 7$  Hz),  $^{19}\text{F}$  NMR (376 MHz,  $\text{DMSO}-d_6$ )  $\delta$  -74.09 (s); UV/Vis ( $\text{CH}_3\text{CN}$ ):  $\lambda_{\text{max}}$  273 nm.

### 1-(Trifluoromethyl)naphthalene (2g) [3]

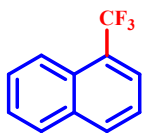

Colorless oil, TLC (Petroleumether: Ethyl acetate, 90:10 v/v):  $R_f = 0.51$ ; IR (thin film) 3072, 1603, 1588, 1489, 1275, 1190, 1029  $\text{cm}^{-1}$ ;  $^1\text{H}$  NMR (400 MHz,  $\text{CDCl}_3$ ):  $\delta$  7.9 (d, 2H), 7.53 (d, 1H), 7.44 (t, 2H), 7.25 (t, 2H),  $^{13}\text{C}$  NMR (100 MHz,  $\text{CDCl}_3$ ):  $\delta$  136.12, 133.75, 133.02, 132.83, 131.73, 129.61, 128.78, 128.07, 125.58, 125.15, 124.92, 124.38;  $^{19}\text{F}$  NMR (376 MHz,  $\text{CDCl}_3$ )  $\delta$  -62.72 (s); UV/Vis ( $\text{CH}_3\text{CN}$ ):  $\lambda_{\text{max}}$  270 nm.

### 1,2,3-Trifluoro-5-(trifluoromethyl)benzene (2h) [3]

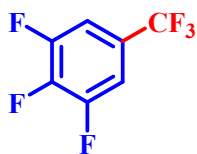

Colorless oil, TLC (Petroleumether: Ethyl acetate, 80:20 v/v):  $R_f = 0.24$ ; IR (thin film) 3054, 1610, 1547, 1498, 1269, 1137, 1047,  $\text{cm}^{-1}$ ;  $^1\text{H}$  NMR (400 MHz,  $\text{DMSO}-d_6$ ):  $\delta$  7.75-7.45 (m, 2H);  $^{13}\text{C}$  NMR (100 MHz,  $\text{DMSO}-d_6$ ):  $\delta$  151.20 (q,  $J = 9$  Hz), 148.89 (q,  $J = 9$  Hz), 141.21 (q,  $J = 15$  Hz), 138.71 (q,  $J = 15$  Hz), 135.38, 131.42, 128.98 (q,  $J = 31$  Hz), 125.95 (q,  $J = 11$  Hz), 117.81 (d,  $J = 17$  Hz), 116.95 (d,  $J = 17$  Hz);  $^{19}\text{F}$  NMR (376 MHz,  $\text{DMSO}-d_6$ )  $\delta$  -164.96 (s), -141.23 (s), -67.42 (s); UV/Vis ( $\text{CH}_3\text{CN}$ ):  $\lambda_{\text{max}}$  277 nm.

### 1,4-Bis(trifluoromethyl)benzene (2i) [3]

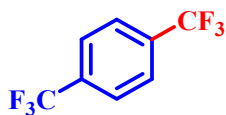

Colorless oil, TLC (Petroleumether: Ethyl acetate, 80:20 v/v):  $R_f = 0.26$ ; IR (thin film) 3065, 1549, 1517, 1472, 1338, 1129, 1058,  $\text{cm}^{-1}$ ;  $^1\text{H}$  NMR (400 MHz,  $\text{DMSO}-d_6$ ):  $\delta$  8.02-7.89 (d, 4H);  $^{13}\text{C}$  NMR (100 MHz,  $\text{DMSO}-d_6$ ):  $\delta$  134.59 (q,  $J = 180$  Hz), 130.34 (q,  $J = 32$  Hz), 123.76 (q,  $J = 81$  Hz);  $^{19}\text{F}$  NMR (376 MHz,  $\text{DMSO}-d_6$ )  $\delta$  -62.74 (d).

### 3-(Trifluoromethyl)pyridine (2j) [3]

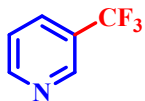

Colorless liquid, TLC (Petroleumether: Ethyl acetate, 80:20 v/v):  $R_f = 0.29$ ; IR (thin film) 3079, 1585, 1496, 1445, 1215, 1165  $\text{cm}^{-1}$ ;  $^1\text{H}$  NMR (400 MHz,  $\text{CDCl}_3$ ):  $\delta$  9.01-8.99 (s, 1H), 8.53-8.50 (m, 2H), 7.80-7.72 (t, 1H),  $^{19}\text{F}$  NMR (376 MHz,  $\text{CDCl}_3$ )  $\delta$  -75.02 (s); UV/Vis ( $\text{CH}_3\text{CN}$ ):  $\lambda_{\text{max}}$  268 nm.

### 3-(Trifluoromethyl)quinolone (2k) [3]

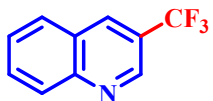

Clear oil, TLC (Petroleumether: Ethyl acetate, 70:30 v/v):  $R_f = 0.34$ ; IR (thin film) 3043, 1607, 1562, 1523, 1458, 1343, 1249, 1194, 1104  $\text{cm}^{-1}$ ;  $^1\text{H}$  NMR (400 MHz,  $\text{CDCl}_3$ ):  $\delta$  9.10-9.08 (m, 1H), 8.25-8.21 (d, 1H), 8.08-8.07 (d, 1H), 8.04-8.01 (d, 1H), 7.63-7.55 (t, 1H), 7.53-7.50 (t, 1H);  $^{13}\text{C}$  NMR (100 MHz,  $\text{CDCl}_3$ ):  $\delta$  151.28, 136.28, 132.43, 128.72, 130.26 (q,  $J_{\text{C-F}} = 162$  Hz), 128.10 (q,  $J_{\text{C-F}} = 6$  Hz), 125.21, 121.95;  $^{19}\text{F}$  NMR (376 MHz,  $\text{CDCl}_3$ )  $\delta$  -59.71 (s); UV/Vis ( $\text{CH}_3\text{CN}$ ):  $\lambda_{\text{max}}$  306 nm.

### 6-Chloro-2-(trifluoromethyl)-1H-indole (2l) [3]

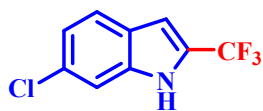

White powder; m.p: 145 °C (lit. [4]145 °C); TLC (Petroleumether: Ethyl acetate, 85:15 v/v):  $R_f = 0.13$ ; IR (thin film) 3411, 3063, 1676, 1542, 1465, 1344, 1289, 1236, 1126  $\text{cm}^{-1}$ ;  $^1\text{H}$  NMR (400 MHz,  $\text{DMSO-}d_6$ ):  $\delta$  9.58 (s, 1H), 7.58-7.56 (d,  $J = 8$  Hz, 1H), 7.50-7.48 (d,  $J = 8$  Hz, 1H), 7.42-7.38 (t, 1H), 6.88-6.86 (d, 1H);  $^{13}\text{C}$  NMR (100 MHz,  $\text{DMSO-}d_6$ ):  $\delta$  154.69, 150.59, 145.80, 137.67 (q,  $J_{\text{C-F}} = 39$  Hz), 122.11 (q,  $J_{\text{C-F}} = 264$  Hz), 119.47, 116.77, 114.08, 109.19;  $^{19}\text{F}$  NMR (376 MHz,  $\text{DMSO-}d_6$ )  $\delta$  -61.39 (s); UV/Vis ( $\text{CH}_3\text{CN}$ ):  $\lambda_{\text{max}}$  281 nm; analysis  $\text{C}_9\text{H}_5\text{ClF}_3\text{N}$  (262.96): Calcd. C, 40.94; H, 1.91; N, 5.30; Found C, 40.95; H, 1.93; N, 5.28.

### 2-(Trifluoromethyl)-1H-indole (2m) [3]

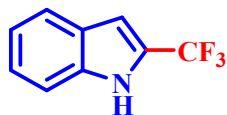

White solid, m.p: 107-108 °C (lit. [5] 107-109 °C); TLC (Petroleumether: Ethyl acetate, 70:30 v/v):  $R_f = 0.28$ ; IR (thin film) 3409, 3053, 1618, 1509, 1428, 1383, 1337, 1265, 1141  $\text{cm}^{-1}$ ;  $^1\text{H}$  NMR (400 MHz,  $\text{DMSO-}d_6$ ):  $\delta$  12.69 (s, 1H), 8.48-8.46 (s, 2H), 8.19-8.16 (d,  $J = 8$  Hz, 1H), 7.60-7.58 (d,  $J = 8$  Hz, 1H), 7.57-7.28 (m, 2H);  $^{13}\text{C}$  NMR (100 MHz,  $\text{DMSO-}d_6$ ):  $\delta$  138.11 (q,  $J_{\text{C-F}} = 5$  Hz), 137.12, 126.11, 124.78, 123.87, 121.66 (q,  $J_{\text{C-F}} = 298$  Hz), 121.56, 113.46, 109.31;  $^{19}\text{F}$  NMR (376 MHz,  $\text{DMSO-}d_6$ )  $\delta$  -71.39 (s); UV/Vis ( $\text{CH}_3\text{CN}$ ):  $\lambda_{\text{max}}$  311 nm; analysis  $\text{C}_9\text{H}_6\text{F}_3\text{N}$  (185.05): Calcd. C, 58.38; H, 3.27; N, 7.57; Found C, 58.37; H, 3.29; N, 7.55.

### 2-Methyl-3-(trifluoromethyl)-1H-indole (2n) [3]

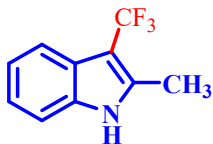

White solid, m.p: 146-147 °C (lit. [6] 147.5 °C); TLC (Petroleumether: Ethyl acetate, 85:15 v/v):  $R_f = 0.17$ ; IR (thin film) 3405, 3058, 2934, 2867, 1644, 1599, 1532, 1458, 1357, 1278, 1158, 1035,  $\text{cm}^{-1}$ ;  $^1\text{H NMR}$  (400 MHz,  $\text{CDCl}_3$ ):  $\delta$  8.9 (s, 1H), 8.04-8.00 (d, 1H), 7.32-7.29 (d, 1H), 7.28 (t,  $J = 12$  Hz, 1H), 7.26-7.18 (t,  $J = 12$  Hz, 1H), 2.72 (s, 3H);  $^{13}\text{C NMR}$  (100 MHz,  $\text{CDCl}_3$ ):  $\delta$  147.34, 132.60, 123.99, 121.61, 121.27, 119.35 (q,  $J_{\text{C-F}} = 284$  Hz), 119.03 (q,  $J_{\text{C-F}} = 32$  Hz), 116.51, 109.18, 106.16, 13.74;  $^{19}\text{F NMR}$  (376 MHz,  $\text{CDCl}_3$ )  $\delta$  -74.33 (s); UV/Vis ( $\text{CH}_3\text{CN}$ ):  $\lambda_{\text{max}}$  271 nm; analysis  $\text{C}_{10}\text{H}_8\text{F}_3\text{N}$  (199.06) : Calcd. C, 60.30; H, 4.05; N, 7.03; Found C, 60.31; H, 4.03; N, 7.04.

### 2-(Trifluoromethyl)benzo[b]thiophene (2o) [3]

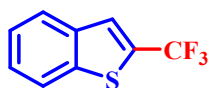

Colorless oil; TLC (Petroleumether: Ethyl acetate, 80:20 v/v):  $R_f = 0.39$ ; IR (thin film) 3079, 1521, 1458, 1284, 1171  $\text{cm}^{-1}$ ;  $^1\text{H NMR}$  (400 MHz,  $\text{DMSO-}d_6$ ):  $\delta$  8.64 (s, 1H), 7.98-7.89 (m, 2H), 7.37-7.35 (m, 2H);  $^{13}\text{C NMR}$  (100 MHz,  $\text{DMSO-}d_6$ ):  $\delta$  142.64, 140.48, 139.36 (q,  $J_{\text{C-F}} = 31$  Hz), 137.37 (q,  $J_{\text{C-F}} = 5$  Hz), 132.70, 127.23 (q,  $J_{\text{C-F}} = 304$  Hz), 124.84, 124.01 (d,  $J_{\text{C-F}} = 6$  Hz), 122.39;  $^{19}\text{F NMR}$  (376 MHz,  $\text{DMSO-}d_6$ )  $\delta$  -73.78 (s); UV/Vis ( $\text{CH}_3\text{CN}$ ):  $\lambda_{\text{max}}$  330 nm.

### 2-(Trifluoromethyl)benzofuran (2p) [3]

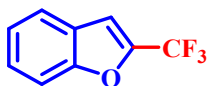

Colorless oil; TLC (Petroleumether: Ethyl acetate, 80:20 v/v):  $R_f = 0.39$ ; IR (thin film) 3058, 1575, 1449, 1308, 1280, 1127, 1126, 1071  $\text{cm}^{-1}$ ;  $^1\text{H NMR}$  (400 MHz,  $\text{DMSO-}d_6$ ):  $\delta$  8.3-8.21 (d, H), 7.67-7.65 (d, H), 7.57-7.54 (d, H), 7.45-7.37 (m, 2H);  $^{13}\text{C NMR}$  (100 MHz,  $\text{DMSO-}d_6$ ):  $\delta$  156.42, 127.64, 125.25, 124.18 (q,  $J_{\text{C-F}} = 138$  Hz), 122.48, 121.74, 117.41, 111.33, 111.13 (q,  $J_{\text{C-F}} = 270$  Hz),  $^{19}\text{F NMR}$  (376 MHz,  $\text{DMSO-}d_6$ )  $\delta$  -73.74 (s).

NMR ( $^1\text{HNMR}$ ,  $^{13}\text{CNMR}$ ,  $^{19}\text{FNMR}$  purified products)

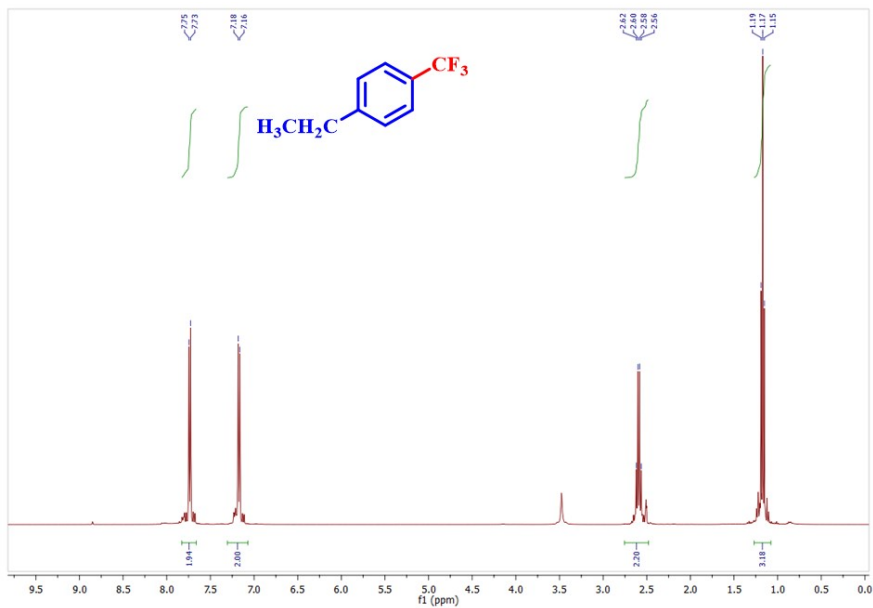

Figure S2.  $^1\text{H}$  NMR spectrum of 1-ethyl-4-(trifluoromethyl)benzene [3].

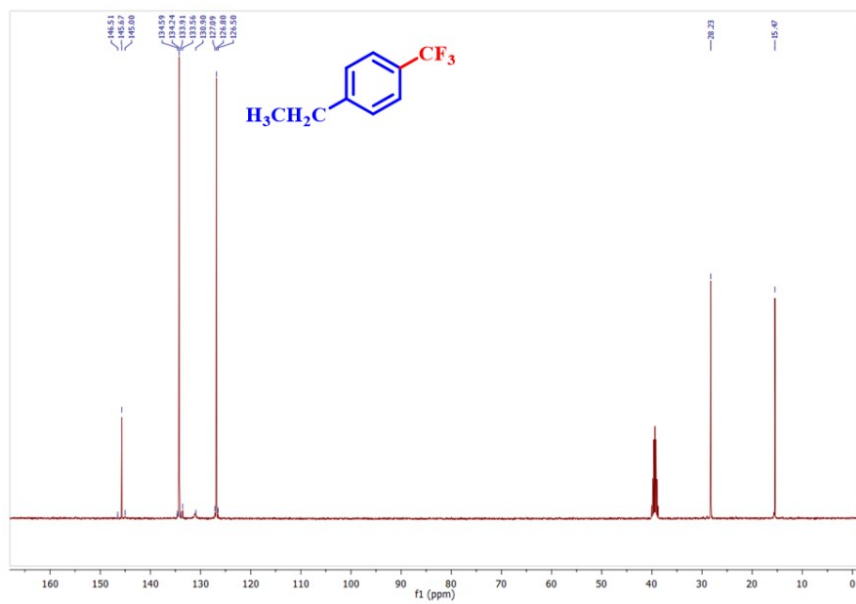

Figure S3.  $^{13}\text{C}$  NMR spectrum of 1-ethyl-4-(trifluoromethyl)benzene [3].

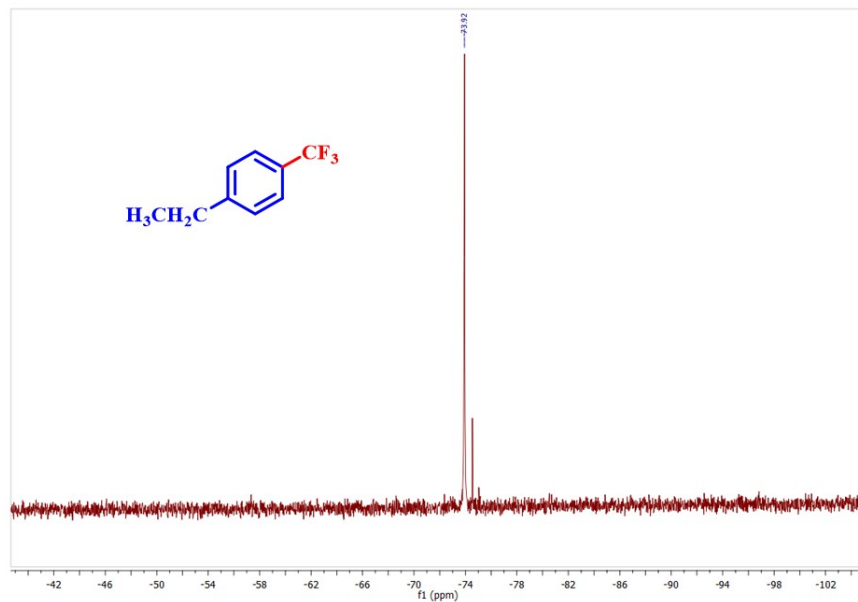

Figure S4.  $^{19}\text{F}$  NMR spectrum of 1-ethyl-4-(trifluoromethyl)benzene [3].

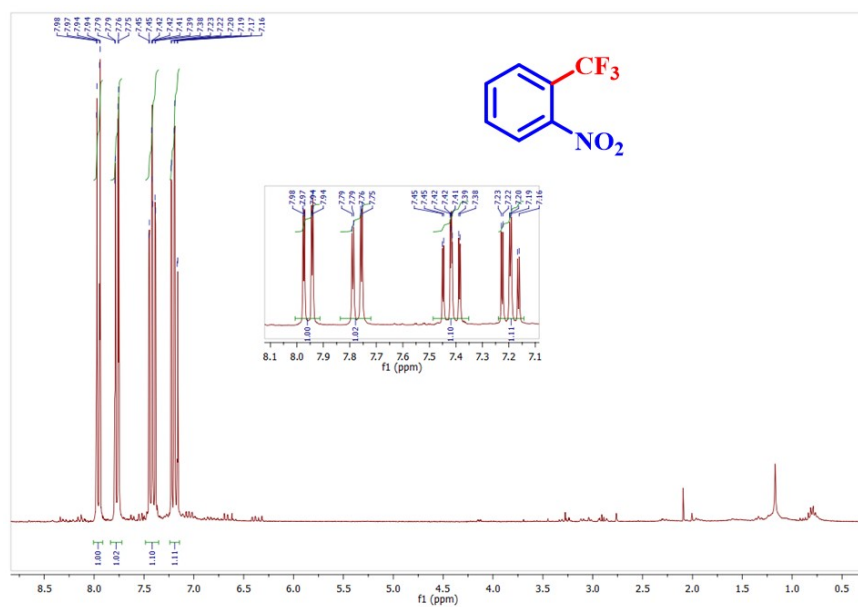

Figure S5.  $^1\text{H}$  NMR spectrum of 1-nitro-2-(trifluoromethyl)benzene [3].



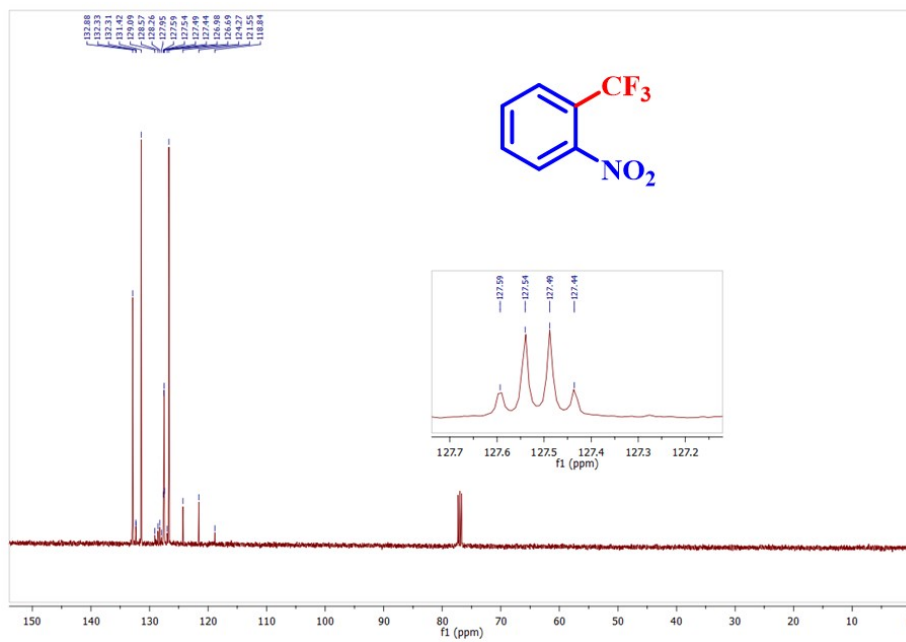

Figure S6. <sup>13</sup>C NMR spectrum of 1-nitro-2-(trifluoromethyl)benzene [3].

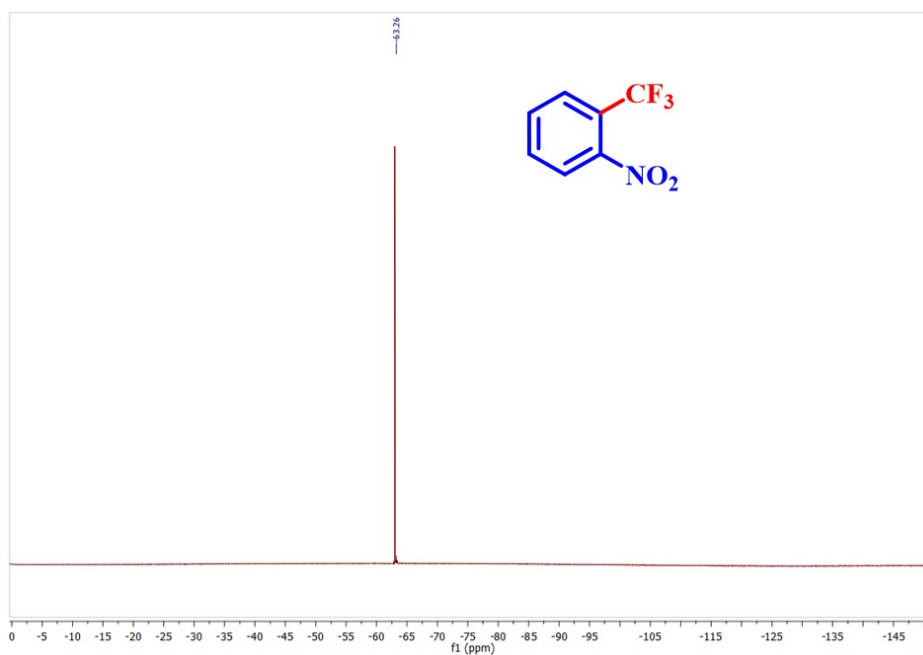

Figure S7. <sup>19</sup>F NMR spectrum of 1-nitro-2-(trifluoromethyl)benzene [3].

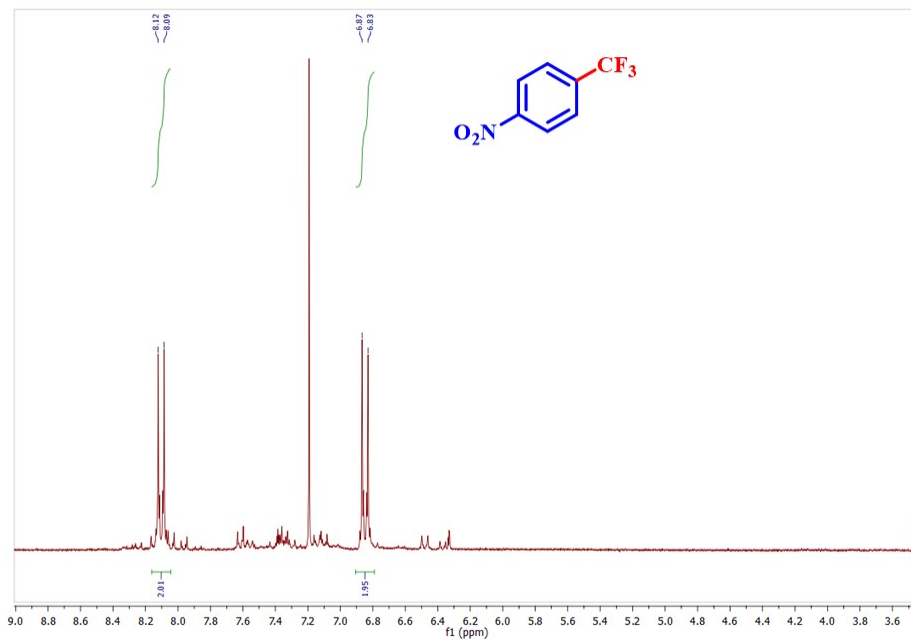

Figure S8.  $^1\text{H}$  NMR spectrum of 1-nitro-4-(trifluoromethyl)benzene [3].

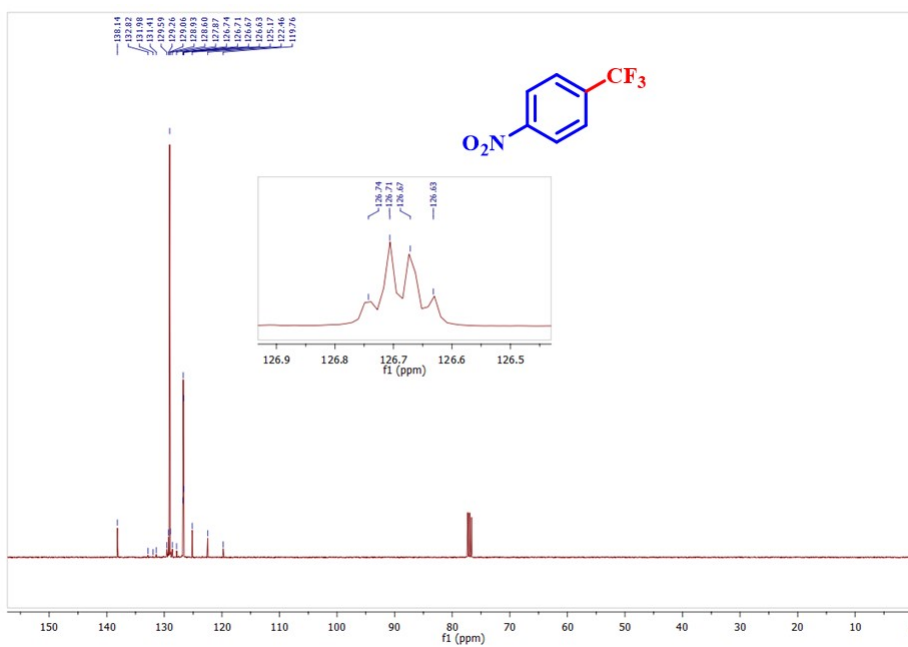

Figure S9.  $^{13}\text{C}$  NMR spectrum of 1-nitro-4-(trifluoromethyl)benzene [3].

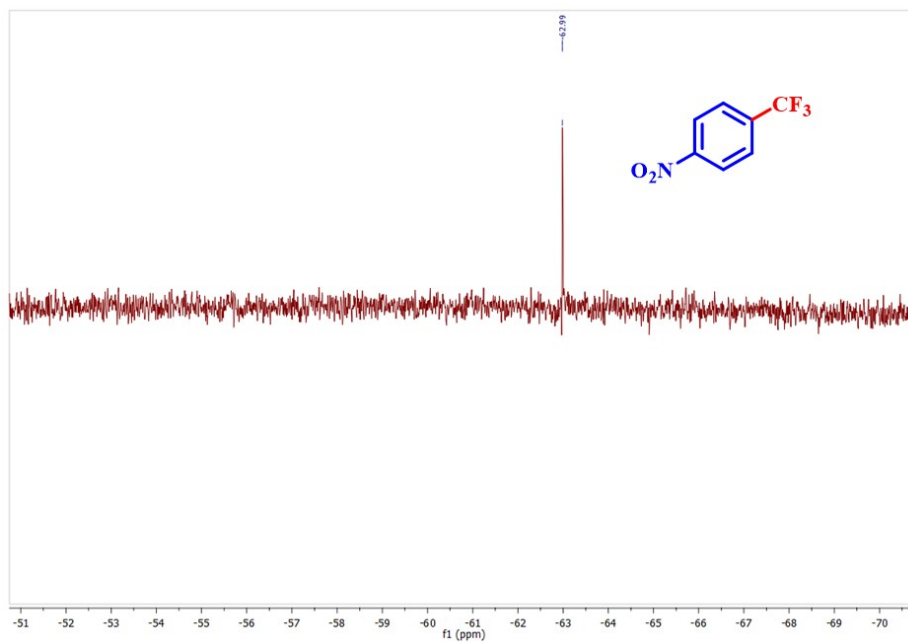

Figure S10.  $^{19}\text{F}$  NMR spectrum of 1-nitro-4-(trifluoromethyl)benzene [3].

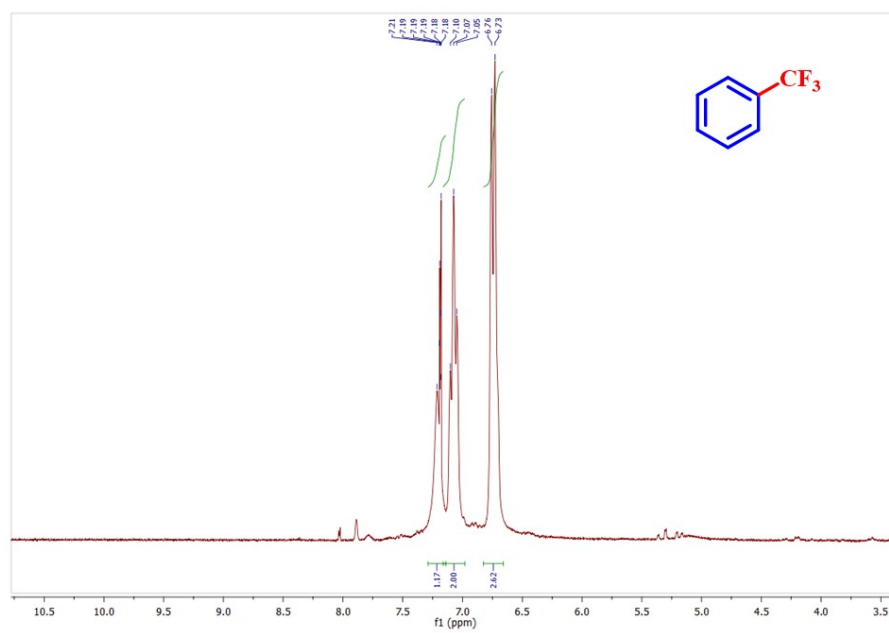

Figure S11.  $^1\text{H}$  NMR spectrum of (trifluoromethyl)benzene [3].

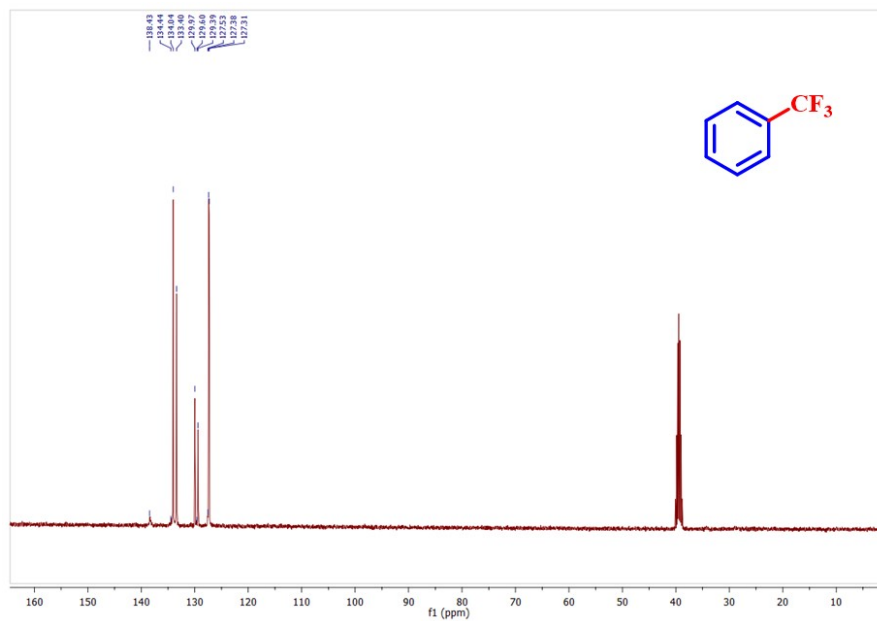

Figure S12. <sup>13</sup>C NMR spectrum of (trifluoromethyl)benzene [3].

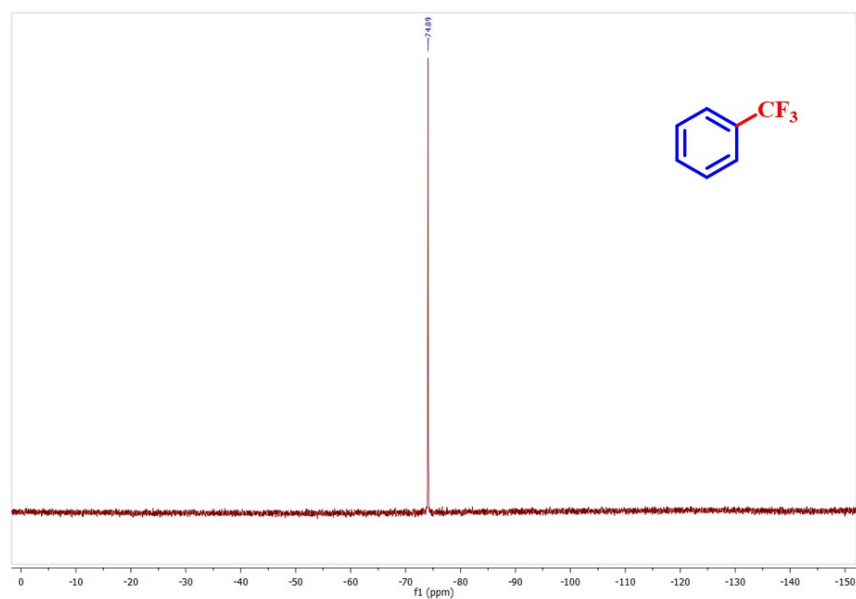

Figure S13. <sup>19</sup>F NMR spectrum of (trifluoromethyl)benzene [3].

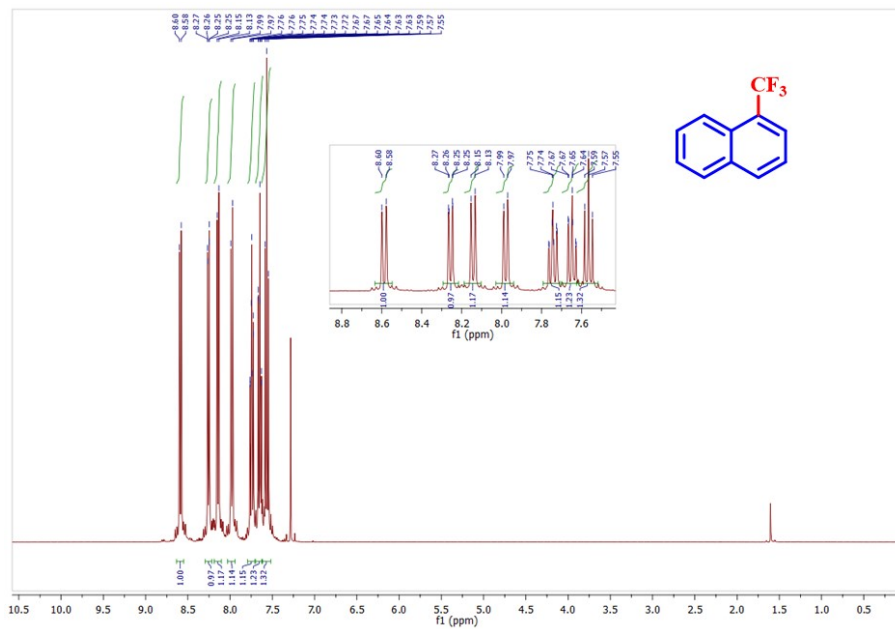

Figure S14.  $^1\text{H}$  NMR spectrum of 1-(trifluoromethyl)naphthalene [3].

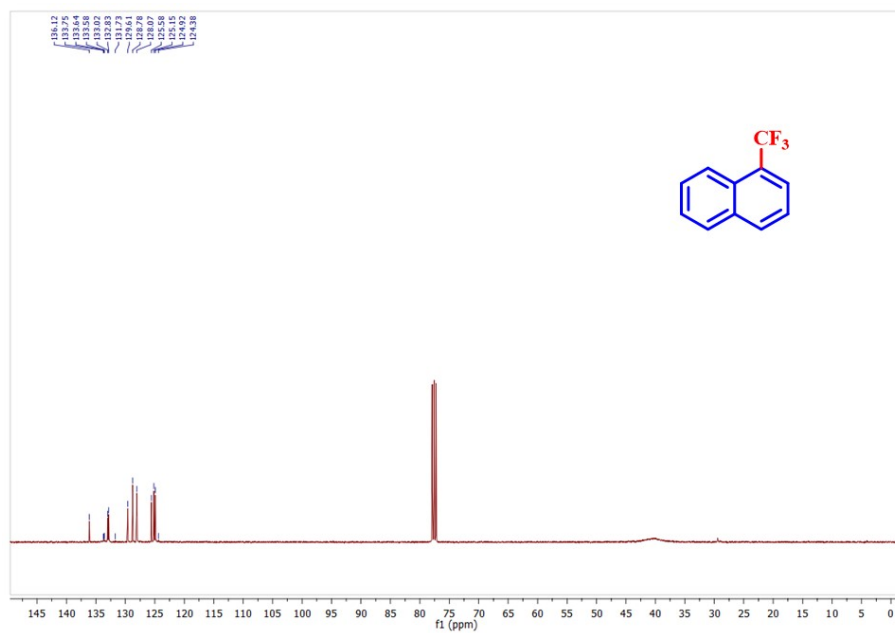

Figure S15.  $^{13}\text{C}$  NMR spectrum of 1-(trifluoromethyl)naphthalene [3].

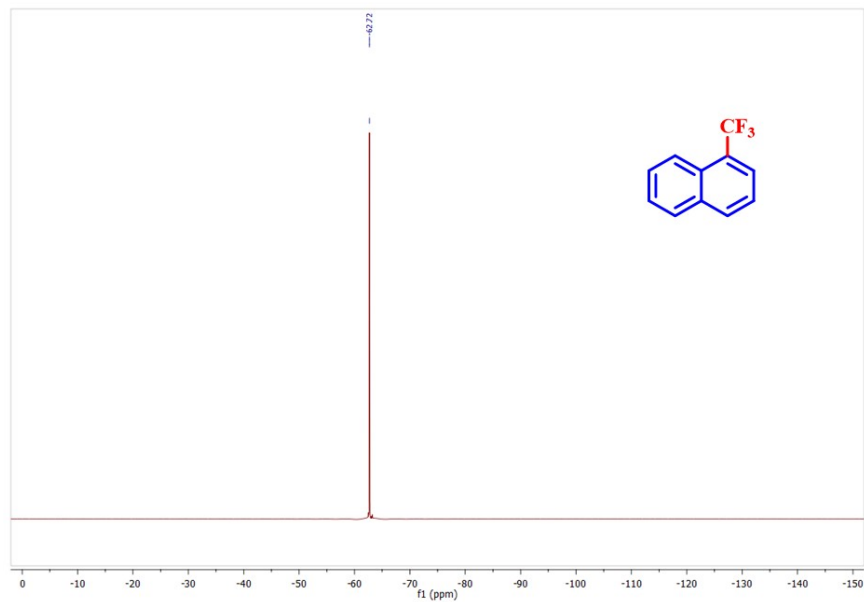

Figure S16.  $^{19}\text{F}$  NMR spectrum of 1-(trifluoromethyl)naphthalene [3].

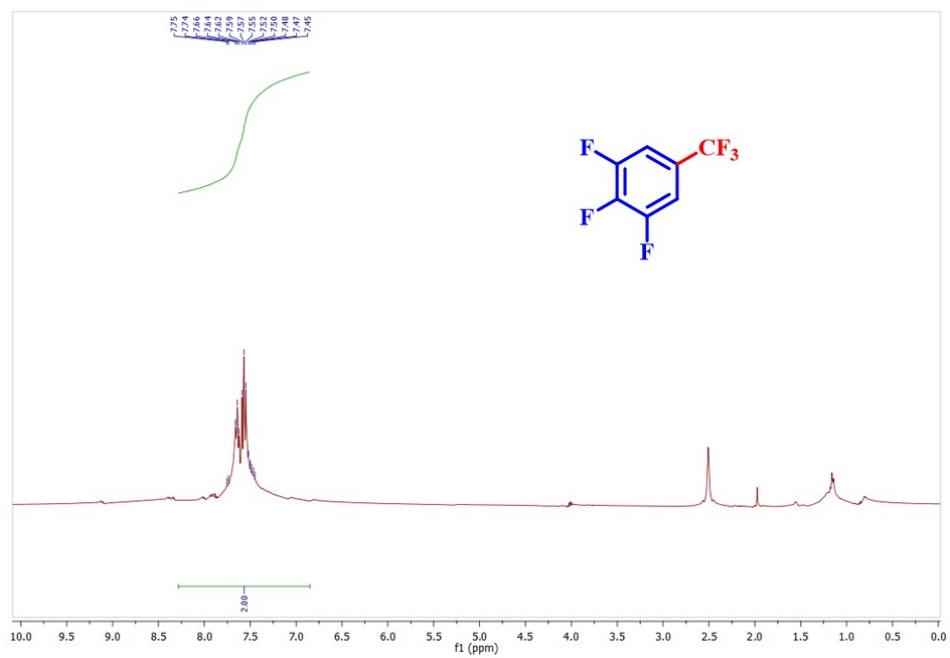

Figure S17.  $^1\text{H}$  NMR spectrum of 1,2,3-Trifluoro-5-(trifluoromethyl)benzene [3].

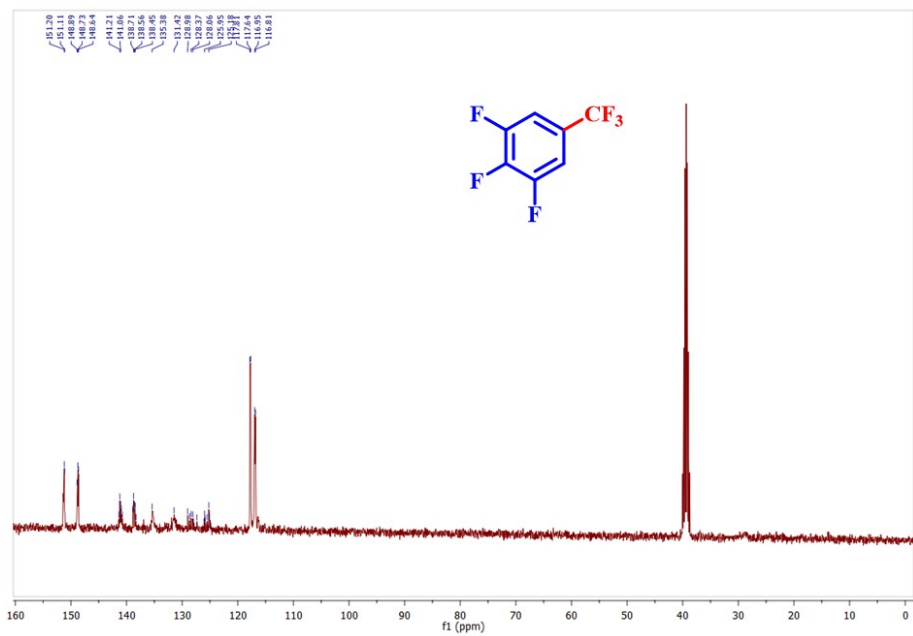

Figure S18.  $^{13}\text{C}$  NMR spectrum of 1,2,3-Trifluoro-5-(trifluoromethyl)benzene [3].

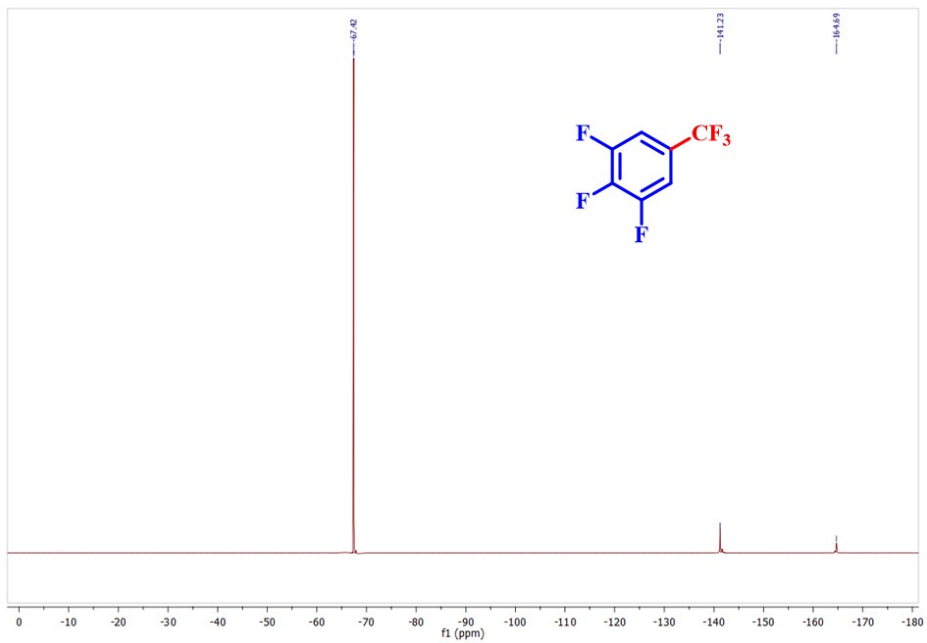

Figure S19.  $^{19}\text{F}$  NMR spectrum of 1,2,3-Trifluoro-5-(trifluoromethyl)benzene [3].

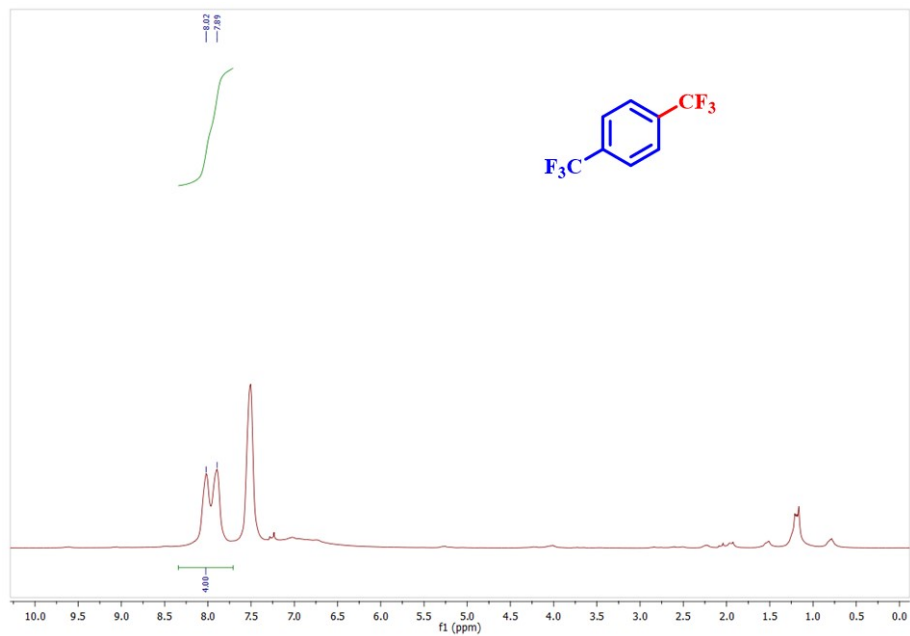

Figure S20.  $^1\text{H}$  NMR spectrum of 1,4-bis(trifluoromethyl)benzene [3].

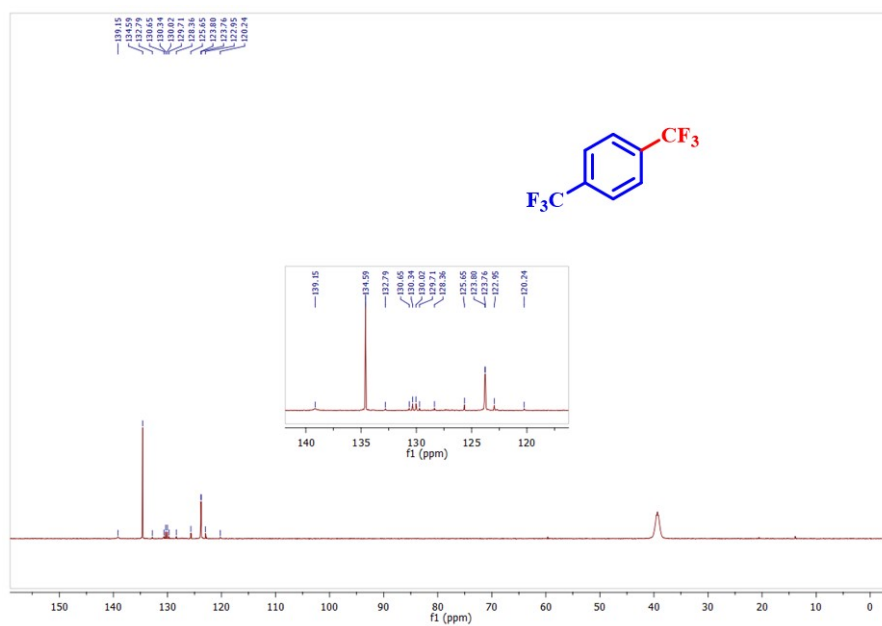

Figure S21.  $^{13}\text{C}$  NMR spectrum of 1,4-bis(trifluoromethyl)benzene [3].



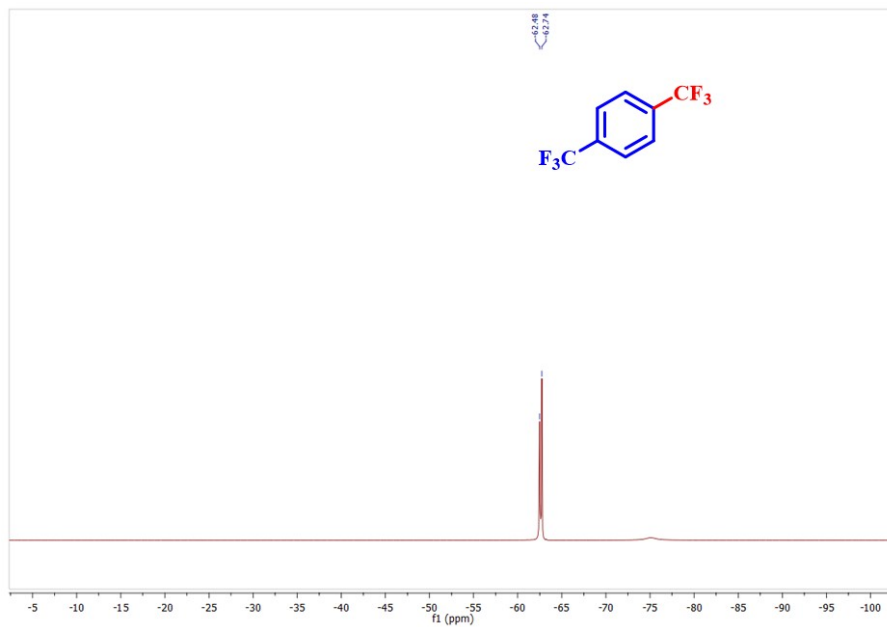

Figure S22.  $^{19}\text{F}$  NMR spectrum of 1,4-bis(trifluoromethyl)benzene [3].

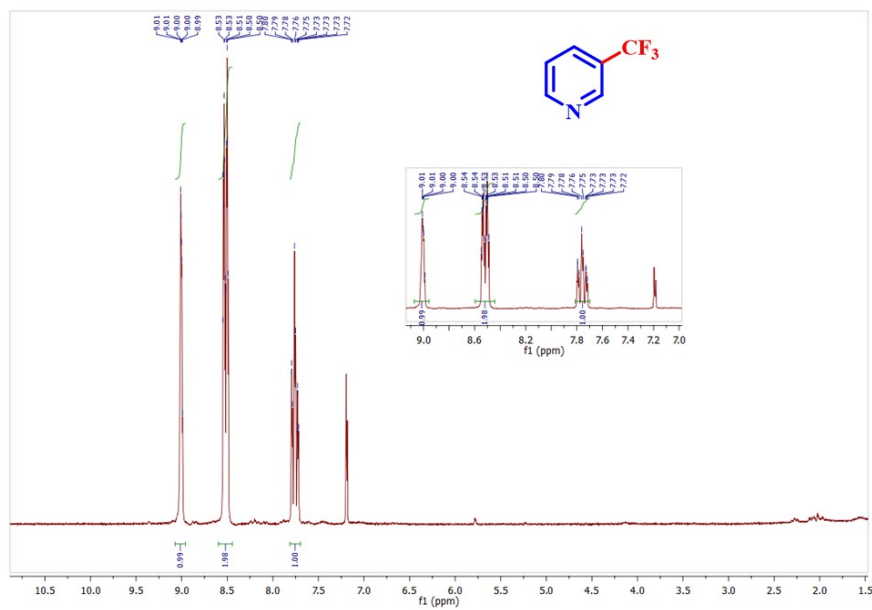

Figure S23.  $^1\text{H}$  NMR spectrum of 3-(trifluoromethyl)pyridine [3].

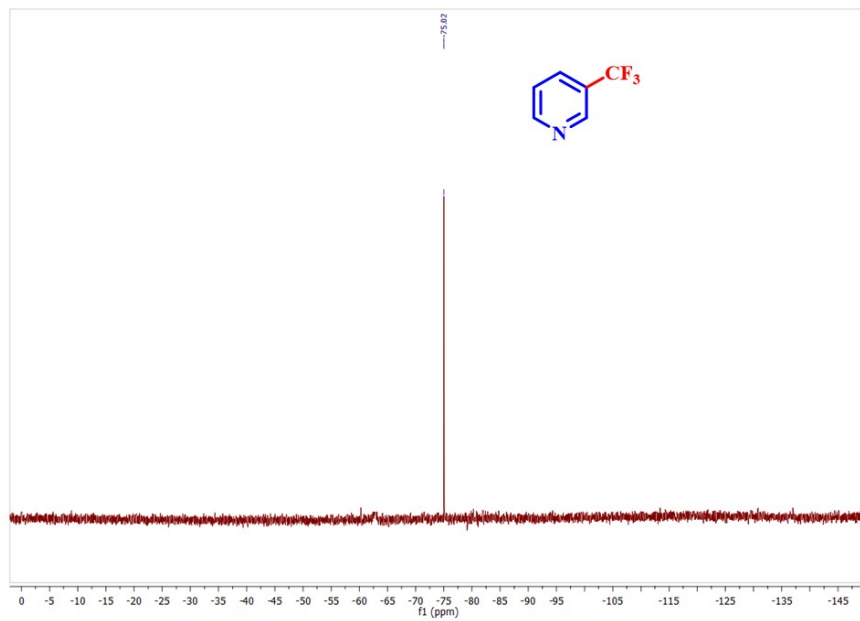

Figure S24.  $^{19}\text{F}$  NMR spectrum of 3-(trifluoromethyl)pyridine [3].

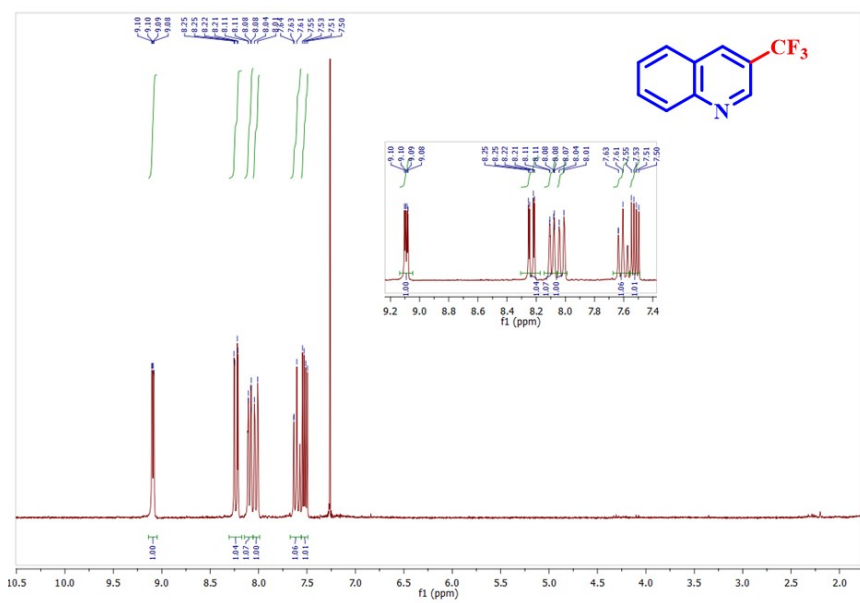

Figure S25.  $^1\text{H}$  NMR spectrum of 3-(trifluoromethyl)quinoline [3].

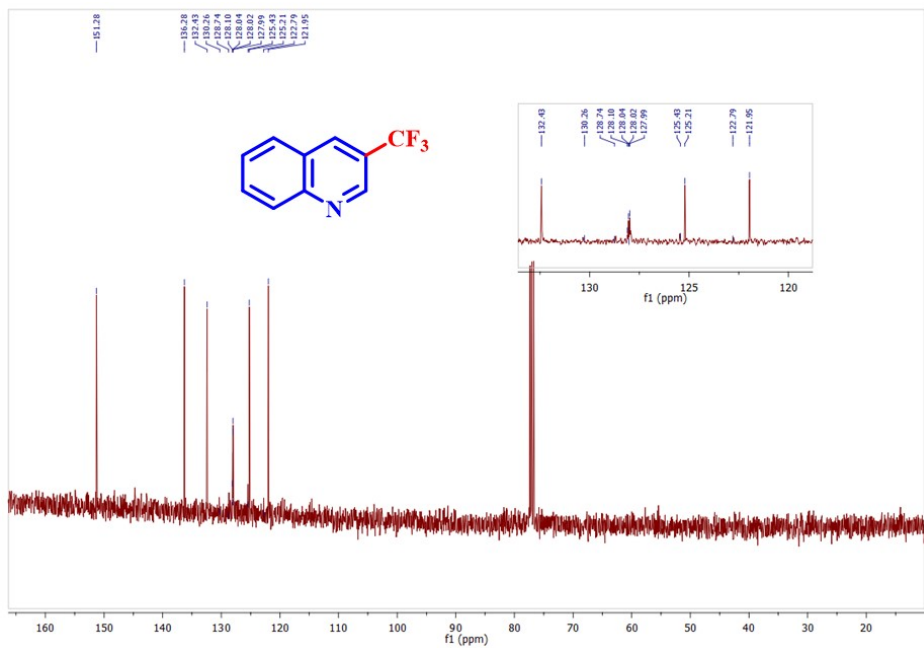

Figure S26. <sup>13</sup>C NMR spectrum of 3-(trifluoromethyl)quinoline [3].

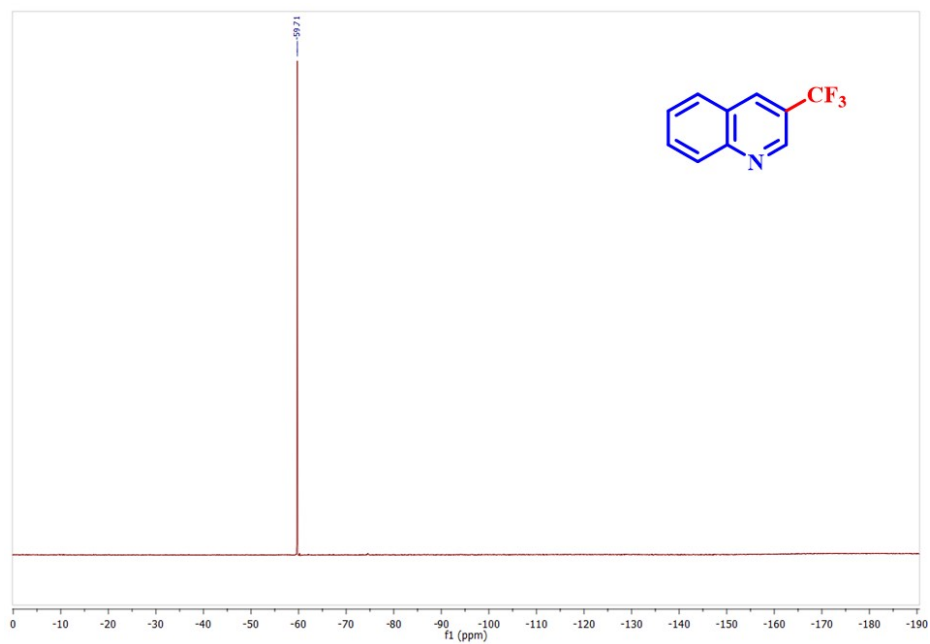

Figure S27. <sup>19</sup>F NMR spectrum of 3-(trifluoromethyl)quinoline [3].

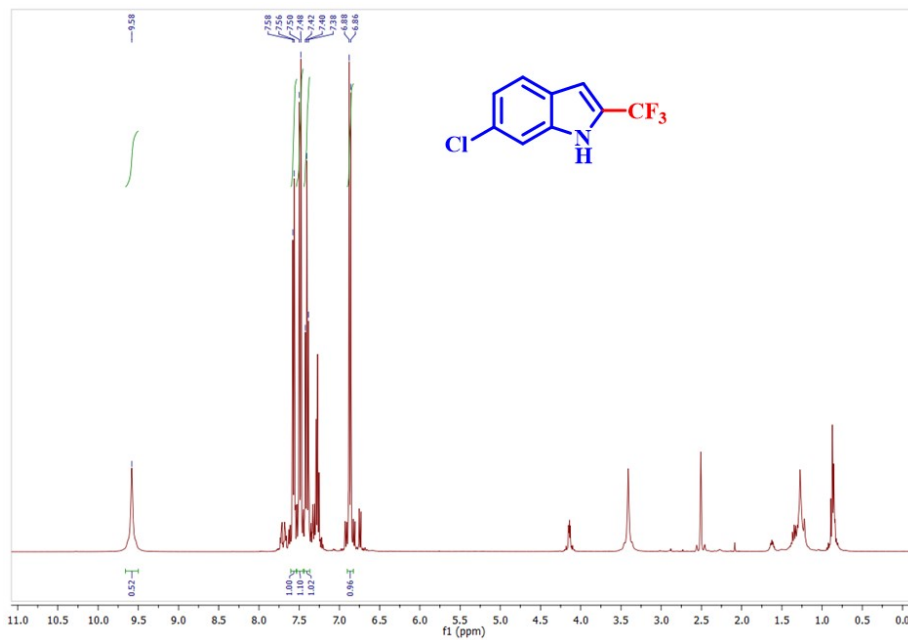

Figure S28. <sup>1</sup>H NMR spectrum of 6-Chloro-2-(trifluoromethyl)-1H-indole [3].

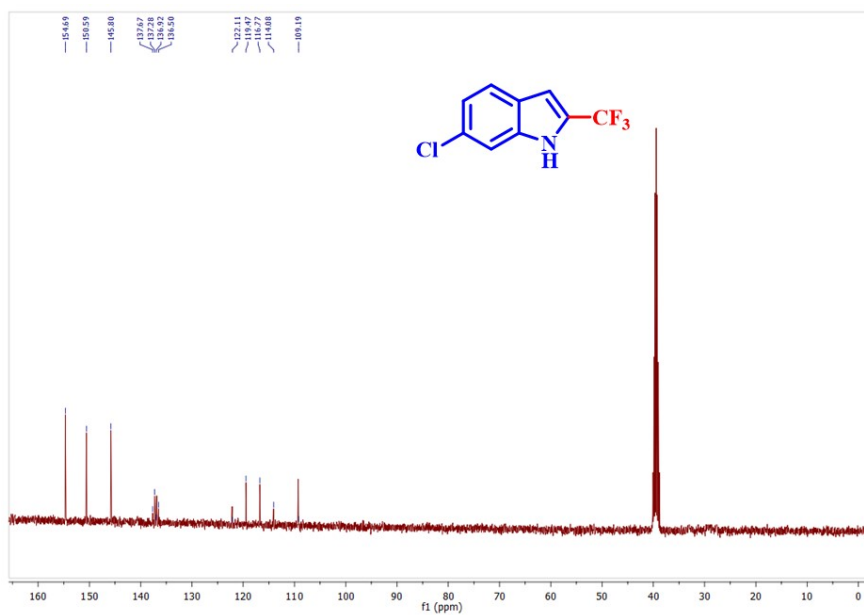

Figure S29. <sup>13</sup>C NMR spectrum of 6-Chloro-2-(trifluoromethyl)-1H-indole [3].

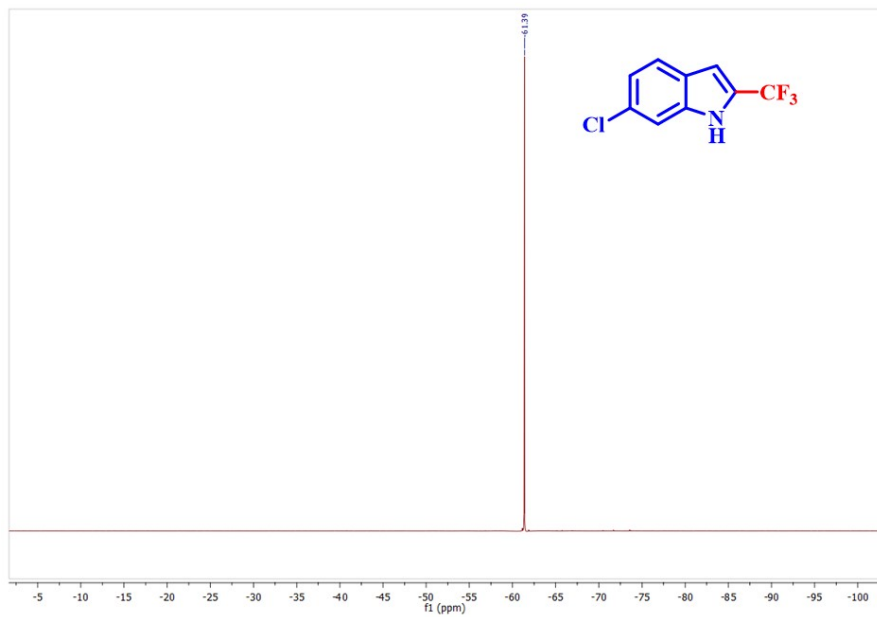

Figure S30.  $^{19}\text{F}$  NMR spectrum of 6-Chloro-2-(trifluoromethyl)-1H-indole [3].

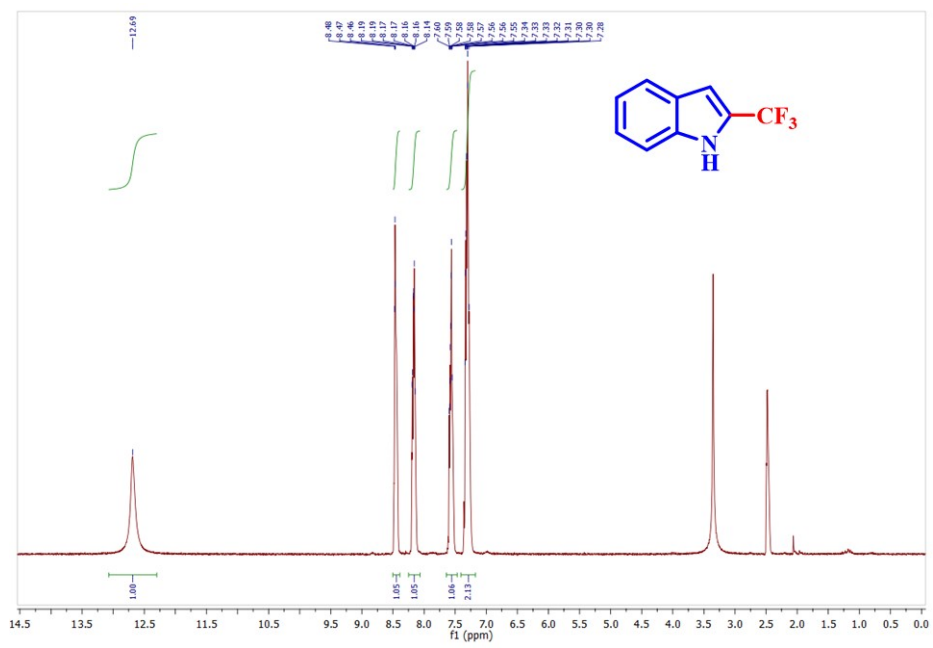

Figure S31.  $^1\text{H}$  NMR spectrum of 2-(trifluoromethyl)-1H-indole [3].

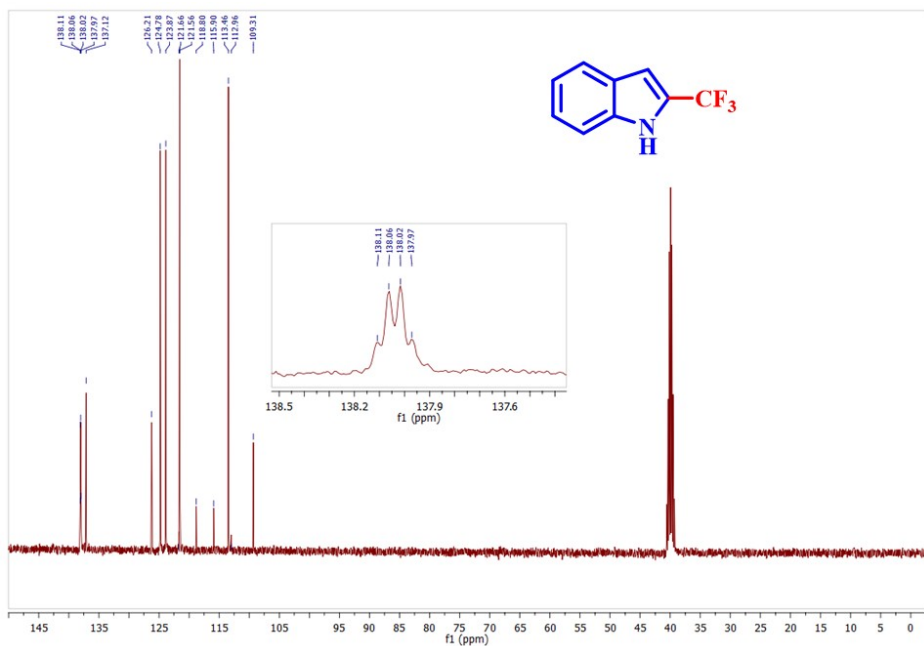

Figure S32. <sup>13</sup>C NMR spectrum of 2-(trifluoromethyl)-1H-indole [3].

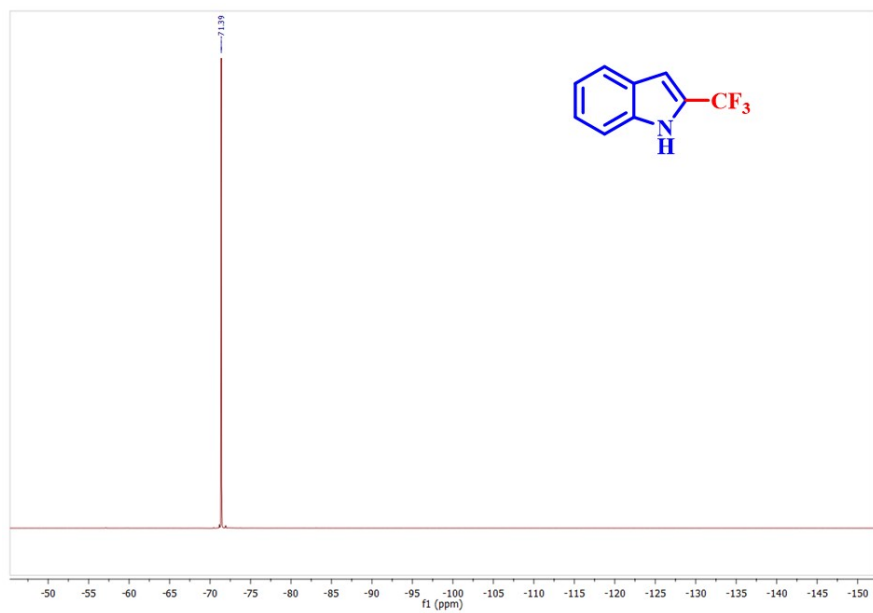

Figure S33. <sup>19</sup>F NMR spectrum of 2-(trifluoromethyl)-1H-indole [3].



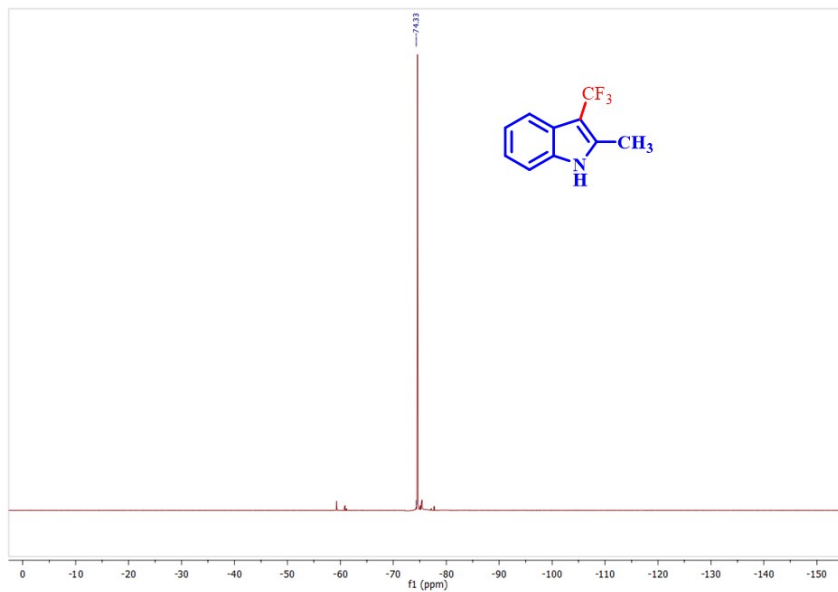

Figure S36.  $^{19}\text{F}$  NMR spectrum of 2-Methyl-3-(trifluoromethyl)-1H-indole [3].

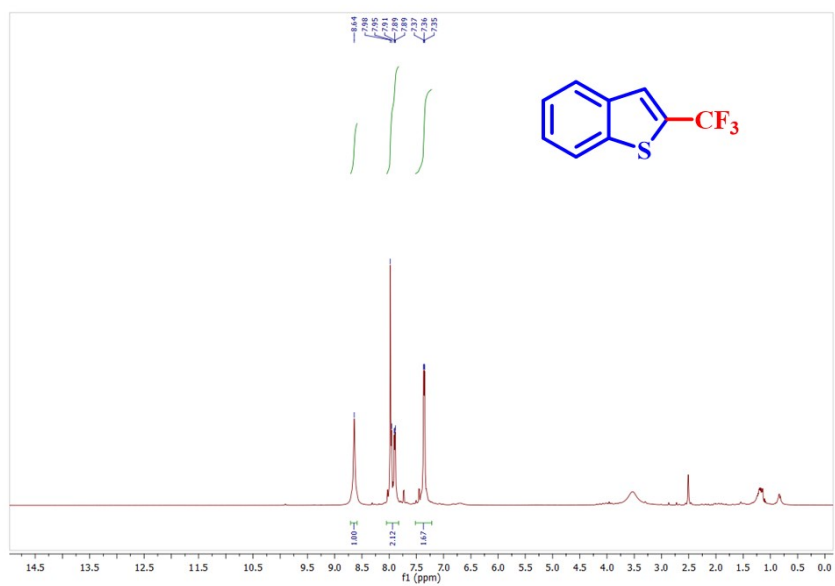

Figure S37.  $^1\text{H}$  NMR spectrum of 2-(Trifluoromethyl)benzo[b]thiophene [3].



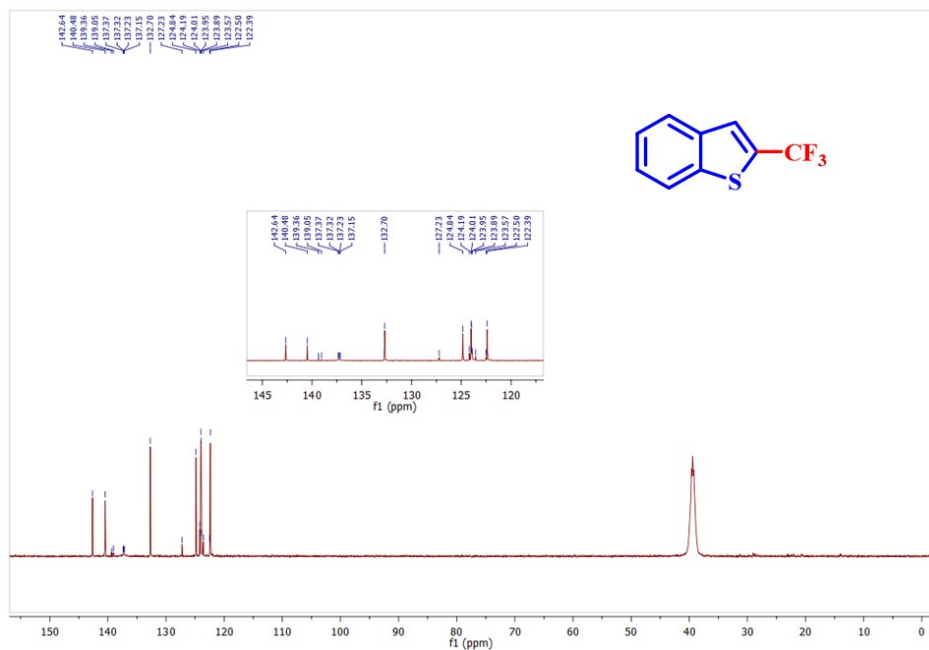

Figure S38. <sup>13</sup>C NMR spectrum of 2-(Trifluoromethyl)benzo[b]thiophene [3].

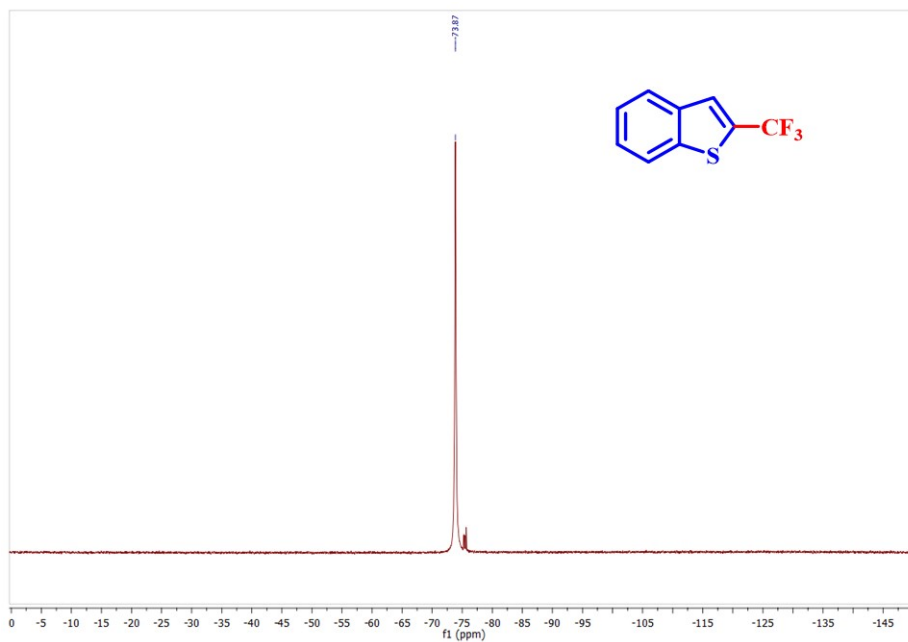

Figure S39. <sup>19</sup>F NMR spectrum of 2-(Trifluoromethyl)benzo[b]thiophene [3].



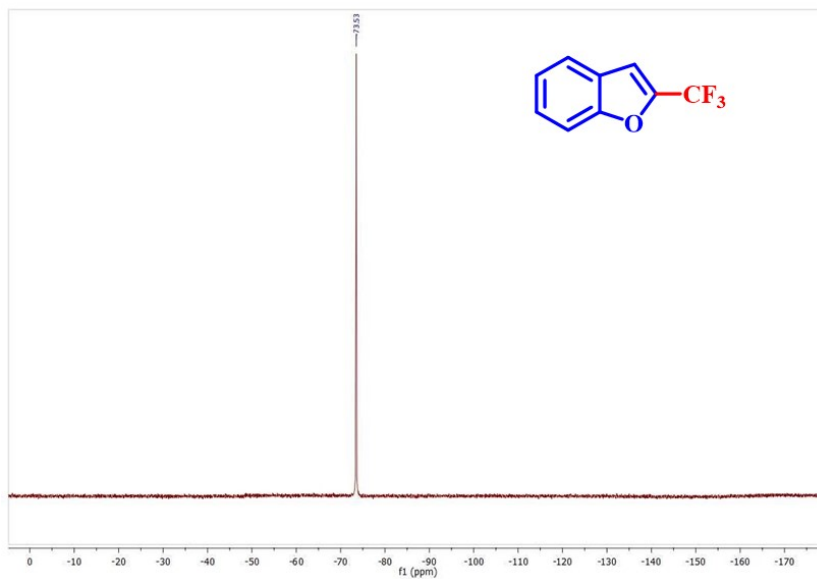

**Figure S42.** <sup>19</sup>F NMR spectrum of 2-(Trifluoromethyl)benzofuran [3].

- [1] Q. Xiao, S. Sarina, E. Jaatinen, J. Jia, D. P. Arnold, H. Liu, H. Zhu, *Green Chem.* 2014, **16**, 4272.
- [2] A. Maji, A. Hazra, D. *Org. Lett.* 2014, **16**, 4524.
- [3] Z. Bazyar, M. Hosseini-Sarvari, *Org. Process Res. Dev.* 2019, **23**, 2345.
- [4] Z. Wang, G. Fenglian, W. Wan, H. Jiang, J. Hao, *J Fluor Chem.* 2007, **128**, 1143.
- [5] V. M. Muzalevskiy, A. V. Shastin, E. S. Balenkova, G. Haufe, V. J. Nenajdenko, *Russ. Chem. Bull.* 2008, **57**, 2175.
- [6] I. Abdiaj, C. Bottecchia, J. Alcazar, T. Noel, *Synthesis* 2017, **49**, 4978.
